# Supplementary material for: Serum autotaxin levels in chronic disease and acute exacerbation of fibrosing interstitial lung disease
Source: PubMed Central journal article supplement — ERJ Open Res. 2022 Apr 11;8(2):00683-2021. doi: 10.1183/23120541.00683-2021 (PMC8995540; doi:10.1183/23120541.00683-2021), 2022-04-11
Supplement: 00683-2021.SUPPLEMENT.pdf [file 00683-2021.SUPPLEMENT.pdf]

Supplementary Table 1. Multivariate analysis using Cox proportional hazards model for predicting independent predictors of worse outcome in male patients with IPF (n=53).

|                  | Hazard ratio | 95%CI        | P value |
|------------------|--------------|--------------|---------|
| Age (years)      | 0.971        | 0.891-1.060  | 0.514   |
| Smoking history  | 1.098        | 0.134-9.002  | 0.931   |
| KL-6             | 0.999        | 0.998-1.001  | 0.296   |
| %FVC             | 0.962        | 0.927-0.998  | 0.041   |
| ATX > 0.721 mg/L | 8.288        | 1.021-67.256 | 0.048   |

CI, confidence intervals; KL-6, Krebs von den Lungen-6; FVC, forced vital capacity.
